# Supplementary material for: Ionic conductivity of solid polyelectrolyte complexes with varying water content: application of the dynamic structure model
Source: Royal Society of Chemistry journal article supplement (doi:10.1039/c8cp05853a), 2019-01-01
Supplement: c8cp05853a1.pdf [file c8cp05853a1.pdf]

## Supporting Information

### Ionic Conductivity of Solid Polyelectrolyte Complexes with Varying Water Content: Application of the Dynamic Structure Model

A. Ostendorf, M. Schönhoff and C. Cramer

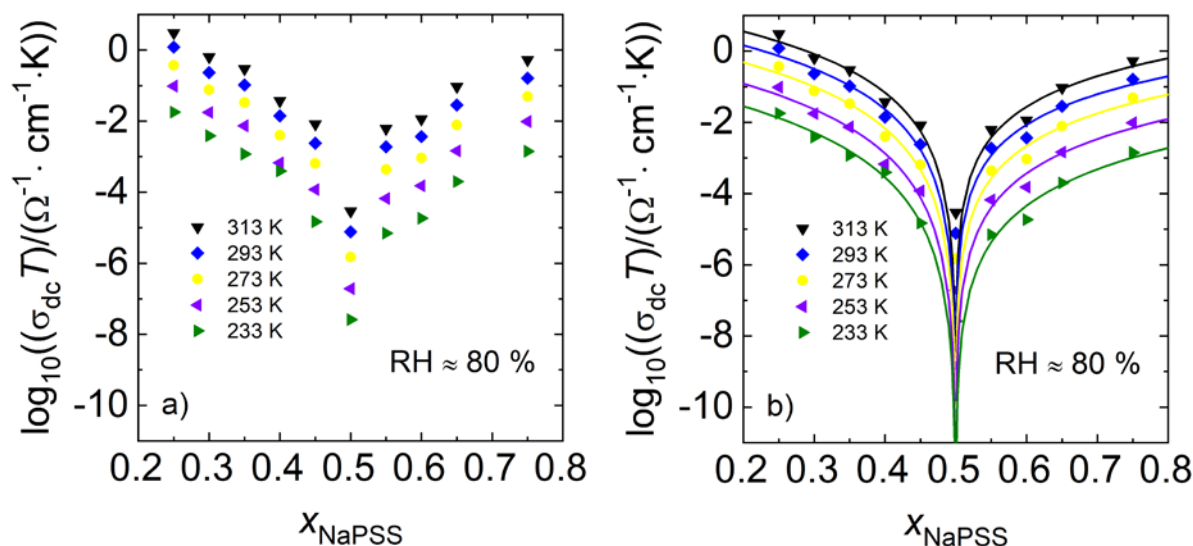

Figure S1: a) PEC-data determined at  $\text{RH} \approx 80\%$  b) data of Fig. S1 a) in comparison with lines calculated on the basis of the dynamic structure model.

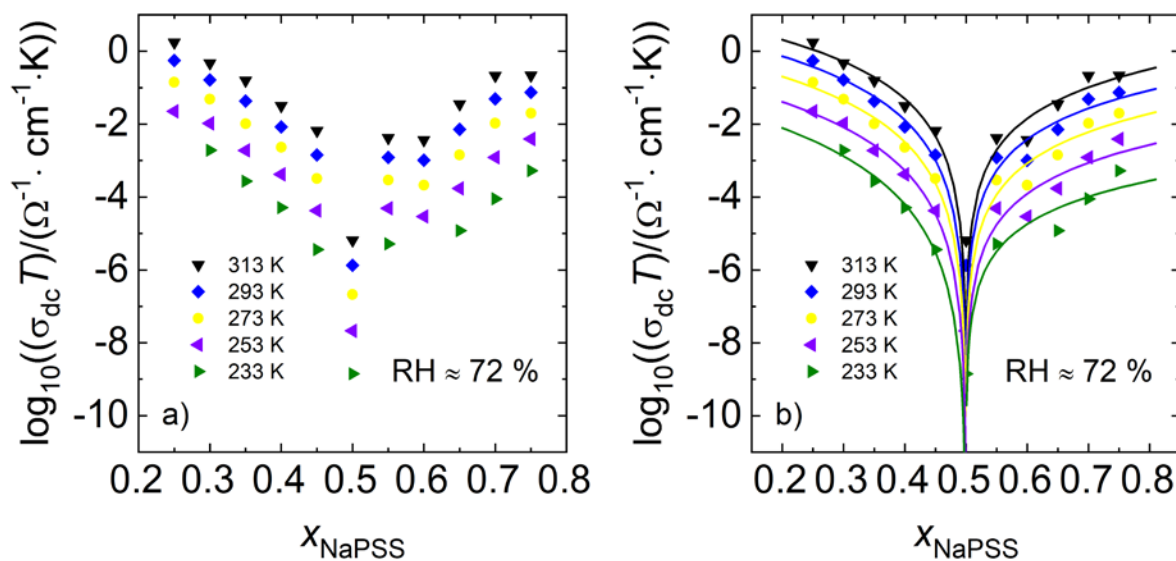

Figure S2: a) PEC-data determined at  $\text{RH} \approx 72\%$  b) data of Fig. S2 a) in comparison with lines calculated on the basis of the dynamic structure model.

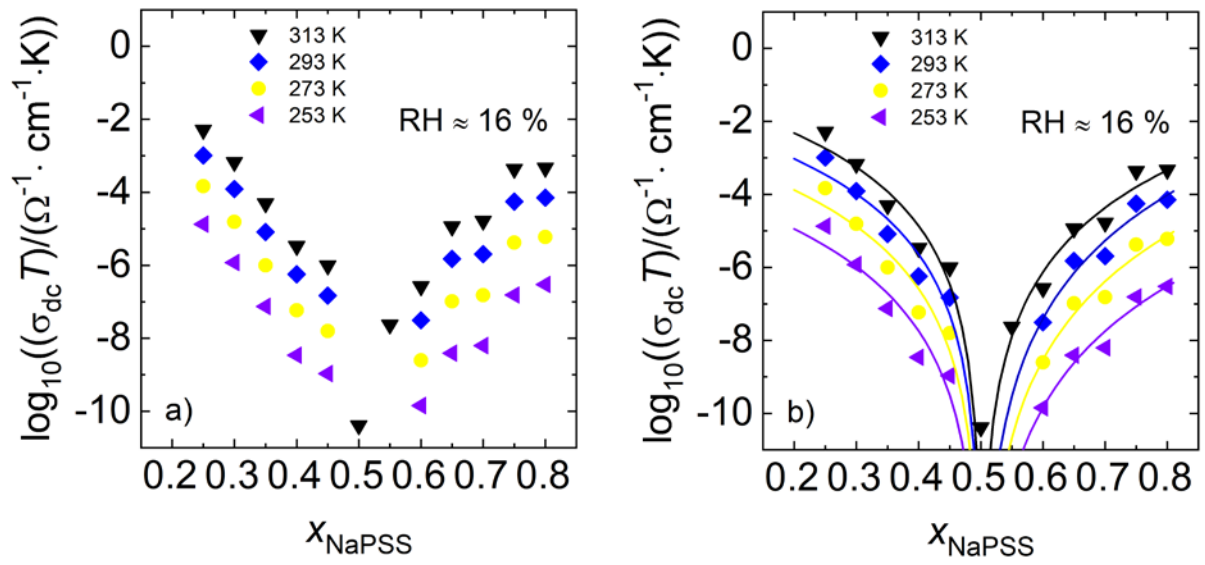

Figure S3: a) PEC-data determined at  $\text{RH} \approx 16\%$  b) data of Fig. S3 a) in comparison with lines calculated on the basis of the dynamic structure model.
